# Supplementary material for: A glutathione disulfide-sensitive Janus nanomachine controlled by an enzymatic AND logic gate for smart delivery
Source: Royal Society of Chemistry journal article supplement (doi:10.1039/d0nr08282a), 2021-01-01
Supplement: d0nr08282a1.pdf [file d0nr08282a1.pdf]

## SUPPORTING INFORMATION

### Glutathione disulfide-sensitive Janus nanomachine controlled by an enzymatic AND logic gate for smart delivery

*Beatriz Mayol,<sup>1</sup> Paula Díez,<sup>1</sup> Alfredo Sánchez,<sup>1</sup> Cristina de la Torre,<sup>2,3,4</sup> Anabel Villalonga,<sup>1</sup> Elena Lucena,<sup>2,3,4</sup> Félix Sancenón,<sup>2,3,4</sup> Paloma Martínez-Ruiz,<sup>1</sup> Diana Vilela,<sup>1</sup> Ramón Martínez-Mañez,<sup>2,3,4,5\*</sup> and Reynaldo Villalonga<sup>1\*</sup>*

<sup>1</sup> Nanosensors and Nanomachines Group, Department of Analytical Chemistry, Faculty of Chemistry, Complutense University of Madrid, 28040 Madrid, Spain

<sup>2</sup> Instituto Interuniversitario de Investigación de Reconocimiento Molecular y Desarrollo Tecnológico (IDM), Universitat Politècnica de València, Universitat de València, Camino de Vera s/n, 46022, Valencia, Spain E-mail: rmaez@qim.upv.es

<sup>3</sup> Unidad Mixta UPV-CIPF de Investigación en Mecanismos de Enfermedades y Nanomedicina, Universitat Politècnica de València, Centro de Investigación Príncipe Felipe, Valencia, Spain.

<sup>4</sup> CIBER de Bioingeniería, Biomateriales y Nanomedicina (CIBER-BBN), Spain.

<sup>5</sup> Unidad Mixta de Investigación en Nanomedicina y Sensores. Universitat Politècnica de València, Instituto de Investigación Sanitaria La Fe, Valencia, Spain

\*Corresponding authors: rmaez@qim.upv.es, rvillalonga@quim.ucm.es

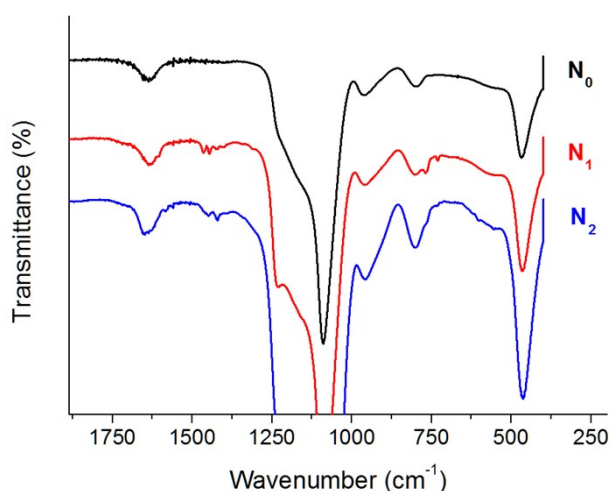

**Figure 1S.** FT-IR analysis for the nanoparticles N<sub>0</sub> - N<sub>2</sub>.

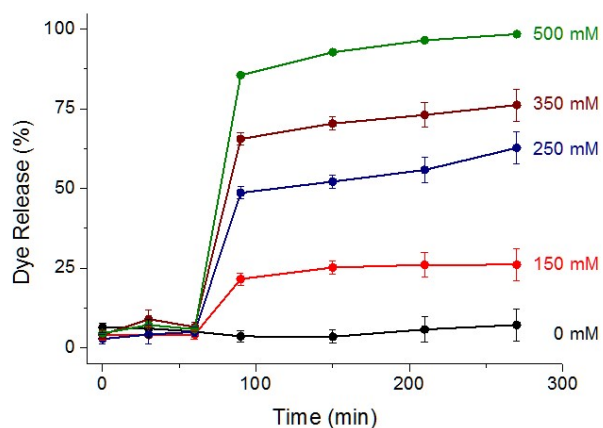

**Figure 2S.** Kinetics of dye release from the nanomachine N<sub>3</sub> in 100 mM sodium phosphate buffer, pH 7.0, in the absence (●) and the presence of glutathione at 150 mM (●), 250 mM (●), 350 mM (●) and 500 mM (●). 100% represents maximum dye release.

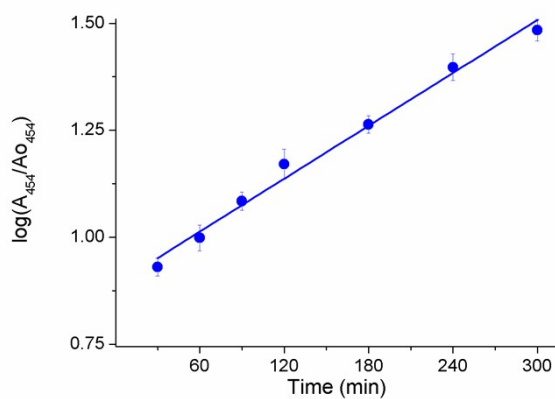

**Figure 3S.** Kinetics of dye release from the nanomachine N<sub>3</sub> in 50 mM NADPH, 100 mM sodium phosphate buffer, pH 7.0, after addition of GSSG at 75 mM final concentration.  $A_{454}$ : absorbance at 454 nm over time,  $A_{0_{454}}$ : absorbance at 454 nm before addition of GSSG.

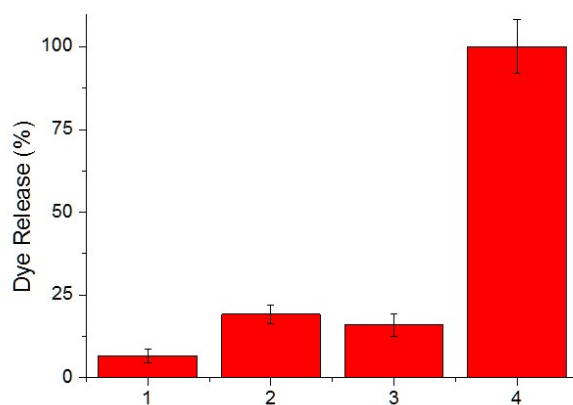

**Figure 4S.** Relative dye release from the nanomachine  $N_3$  after 1 h incubation in 100 mM sodium phosphate buffer, pH 7.0, in the absence (1) and the presence of 75 mM GSSG (2), 50 mM NADPH (3) and 50 mM NADPH + 75 mM GSSG (4). 100% represents maximum dye release.

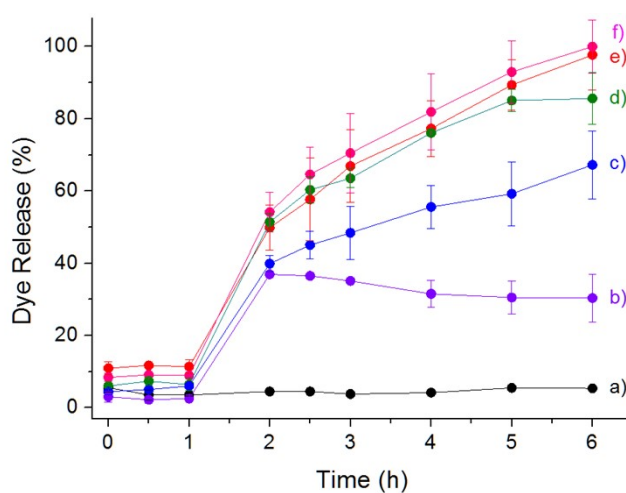

**Figure 5S.** Kinetics of dye release from the nanomachine  $N_3$  in 50 mM NADPH, 100 mM sodium phosphate buffer, in the absence (a, pH 7.0) and the presence of glutathione at 75 mM at pH 8.0 (b), 7.0 (c), 6.0 (d), 5.0 (e) and 4.0 (f). 100% represents maximum dye release.
